# Supplementary material for: Solvent-mediated phase transformation between two tegafur polymorphs in several solvents
Source: Royal Society of Chemistry journal article supplement (doi:10.1039/c4ce01215a), 2014-01-01
Supplement: c4ce01215a1.pdf [file c4ce01215a1.pdf]

## Supporting Information

### Solvent mediated phase transformation between two tegafur polymorphs in several solvents.

Raitis Bobrovs<sup>1,2\*</sup>, Linda Seton<sup>2</sup> and Andris Actiņš<sup>1</sup>

**Table S1. EpiCalc calculation for potential lattice matching between {100}, {110} and {010} face of  $\beta$  tegafur and {001}, {011} and {010} face of  $\alpha$  tegafur.  $V/V_0$  is the dimensionless potential energy parameter used to measure the goodness-of-fit.**

| $\alpha$ face (hkl) | $\beta$ face (hkl) | $V/V_0$ |
|---------------------|--------------------|---------|
| 010                 | 100                | 0.9941  |
| 010                 | 110                | 0.9675  |
| 010                 | 010                | 0.9836  |
| 001                 | 100                | 0.9908  |
| 001                 | 110                | 0.9925  |
| 001                 | 010                | 0.9902  |
| 011                 | 100                | 0.9985  |
| 011                 | 110                | 0.9923  |
| 011                 | 010                | 0.9908  |

The value of  $V/V_0$  indicates the goodness-of-fit between the substrate lattice and the overlayer lattice, where  $V/V_0=1$  indicates that there is no match between lattice points,  $V/V_0=0.5$  – a partial match (for non-hexagonal substrate), and  $V/V_0=0$  – complete matching of the lattice points or crystal faces.

The default setting for overlayer dimensions (25 x 25) and the orientation angle (60° with a step size of 0.25°) was used to test  $\alpha$  and  $\beta$  tegafur lattice match.
